# Supplementary material for: Iron(iii) carboxylate/aminoalcohol coordination clusters with propeller-shaped Fe8 cores: approaching reasonable exchange energies
Source: Royal Society of Chemistry journal article supplement (doi:10.1039/c5dt03024b), 2015-01-01
Supplement: c5dt03024b1.pdf [file c5dt03024b1.pdf]

## Electronic Supplementary Information

### **Iron(III) carboxylate/aminoalcohol coordination clusters with propeller-shaped Fe<sub>8</sub> cores: approaching reasonable exchange energies**

Olga Botezat,<sup>a,b</sup> Jan van Leusen,<sup>b</sup> Victor Ch. Kravtsov,<sup>a</sup> Arkady Ellern,<sup>c</sup> Paul Kögerler,<sup>b,\*</sup> and Svetlana G. Baca<sup>a,\*</sup>

*<sup>a</sup>Institute of Applied Physics, Academy of Science of Moldova, Academiei 5, MD2028 Chisinau, Moldova*

*<sup>b</sup>Institute of Inorganic Chemistry, RWTH Aachen University, Landloweg 1, 52074 Aachen, Germany*

*<sup>c</sup>Department of Chemistry, Iowa State University, Ames, USA*

#### **Corresponding Authors**

\*E-mail: paul.koegerler@ac.rwth-aachen.de (P.K.), sbaca\_md@yahoo.com (S.G.B).

Tel: +49-241-80-93642 (P.K.), +373-22-738154 (S.G.B.).

Fax: +39-241-80-92642 (P.K.), +373-22-738149 (S.G.B.).

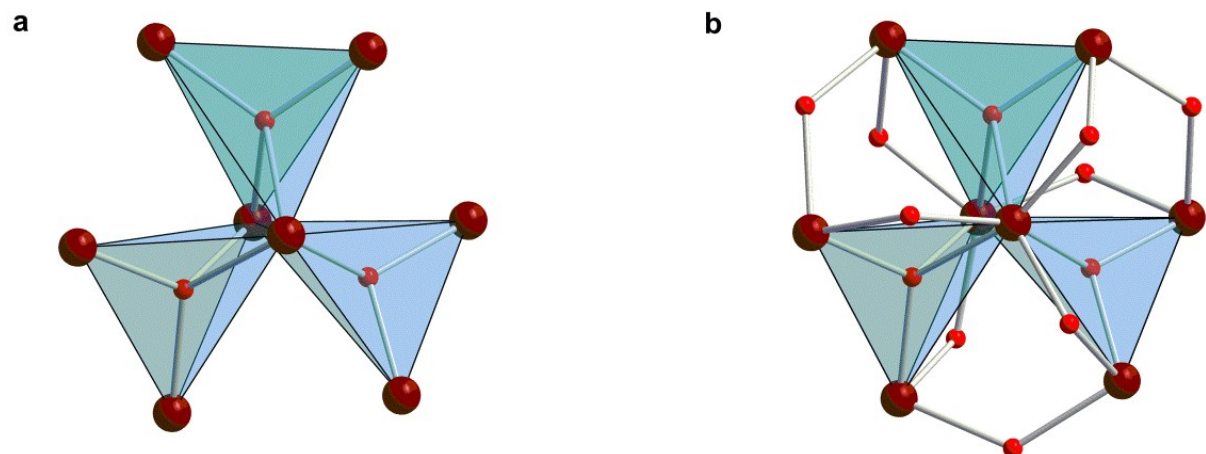

**Figure S1.** The propeller-shaped metal oxide core in compounds **1–4**: a view of (a) the  $\{\text{Fe}_8\text{O}_3\}$  core with three  $\mu_4$ -oxygen atoms and (b) the  $\{\text{Fe}_8\text{O}_{12}\}$  core with three  $\mu_4$ -oxygen atoms and nine bridging alkoxide oxygen atoms of the triethanolamine ligands in **1–3** or three  $\mu_4$ -oxygen atoms, six bridging alkoxide oxygen atoms of the N-methyldiethanolamine and three oxygen atoms of methoxy groups in **4**. Color scheme: Fe: brown spheres; O: red spheres.

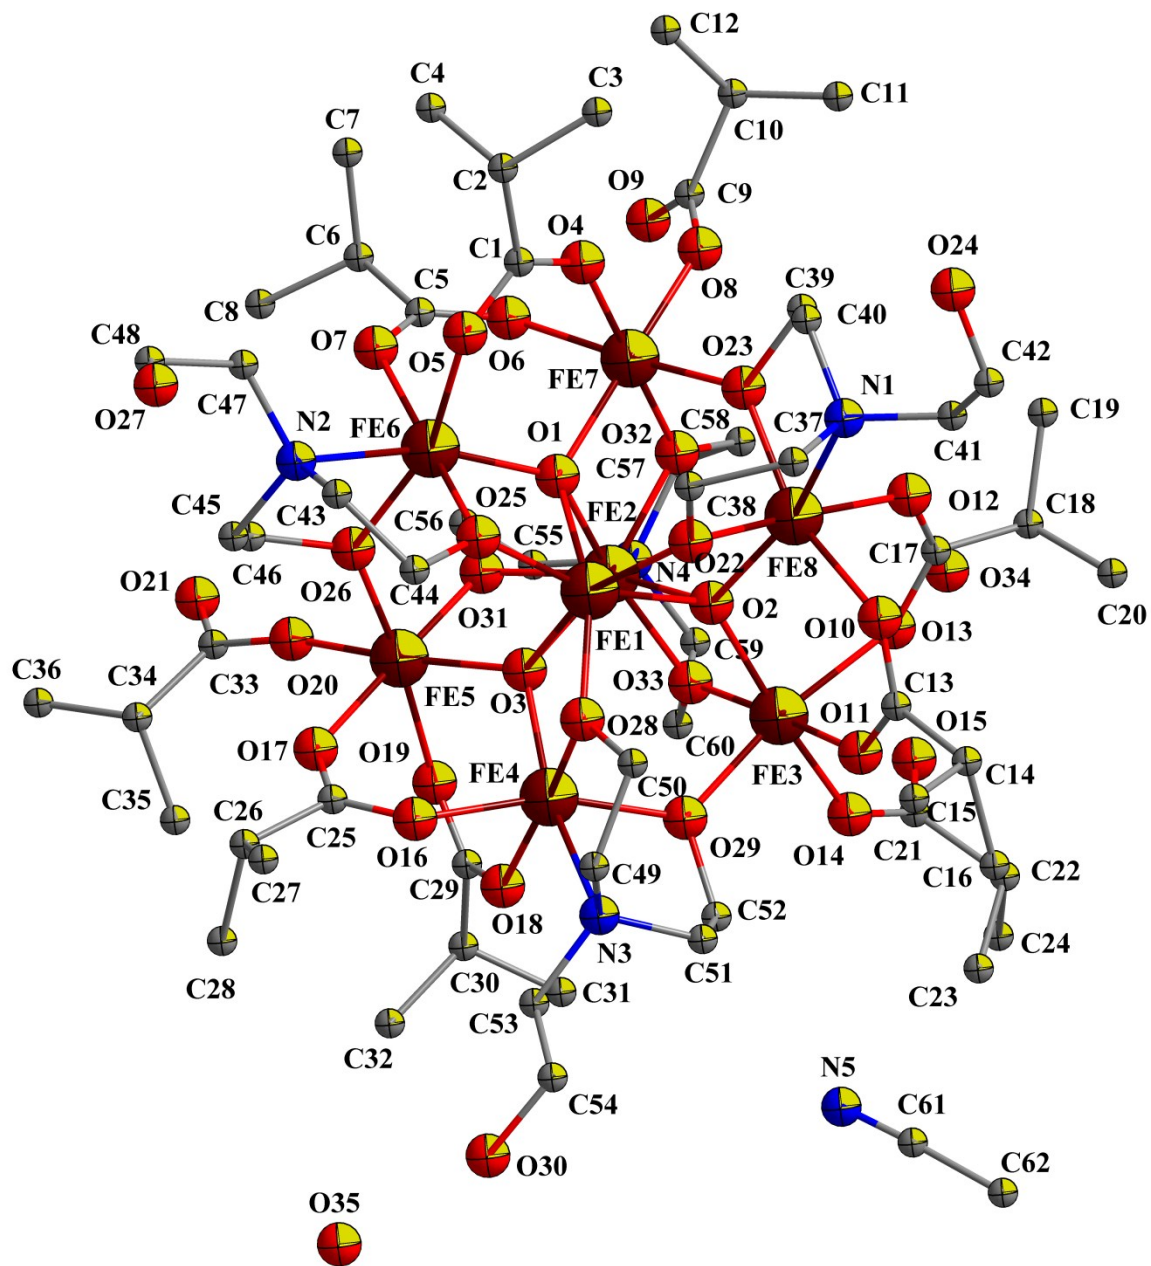

**Figure S2.** Asymmetric unit in the solid-state structure of  $[\text{Fe}_8\text{O}_3(\text{O}_2\text{CCHMe}_2)_9(\text{tea})(\text{teaH})_3] \cdot \text{MeCN} \cdot 2(\text{H}_2\text{O})$  (**1**) with atom numbering scheme. Hydrogen atoms and disorder C atoms are omitted for clarity.

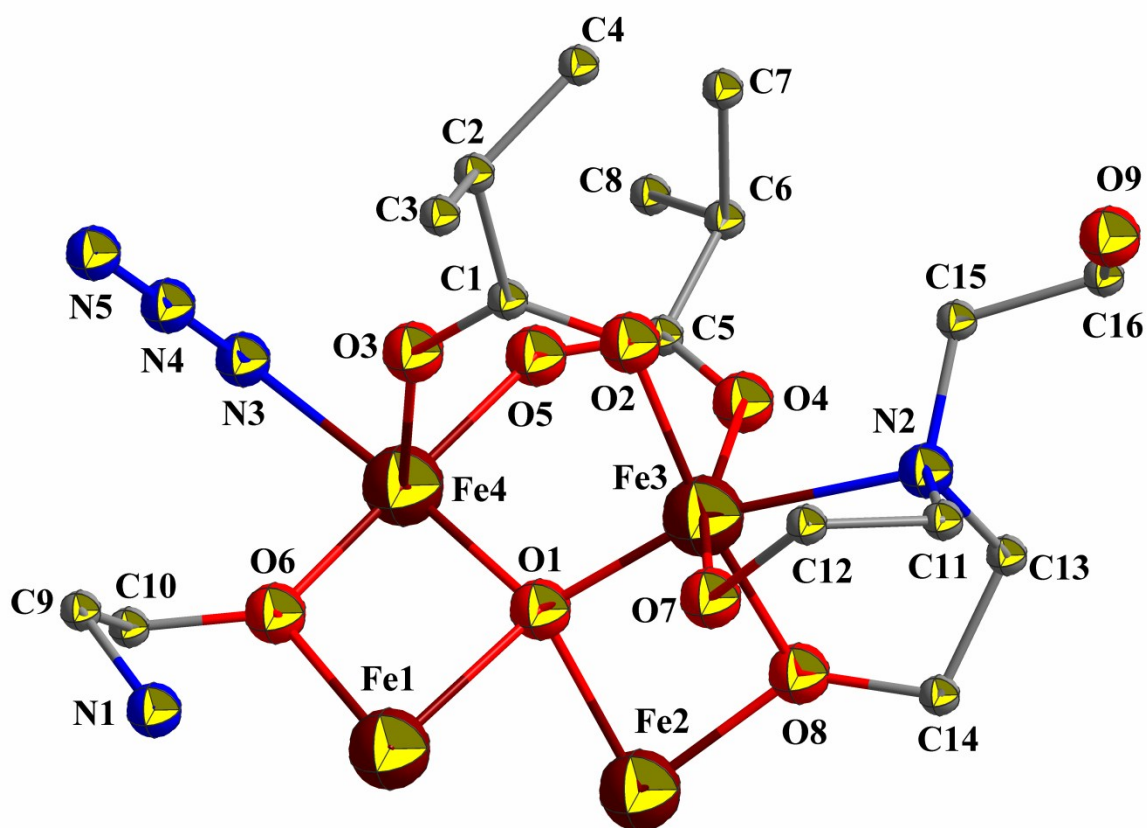

**Figure S3.** Asymmetric unit in the solid-state structure of  $[\text{Fe}_8\text{O}_2(\text{O}_2\text{CCHMe}_2)_6(\text{N}_3)_3(\text{tea})(\text{Htea})_4]$  (2) with atom numbering scheme. Hydrogen atoms and disorder C and O atoms are omitted for clarity.

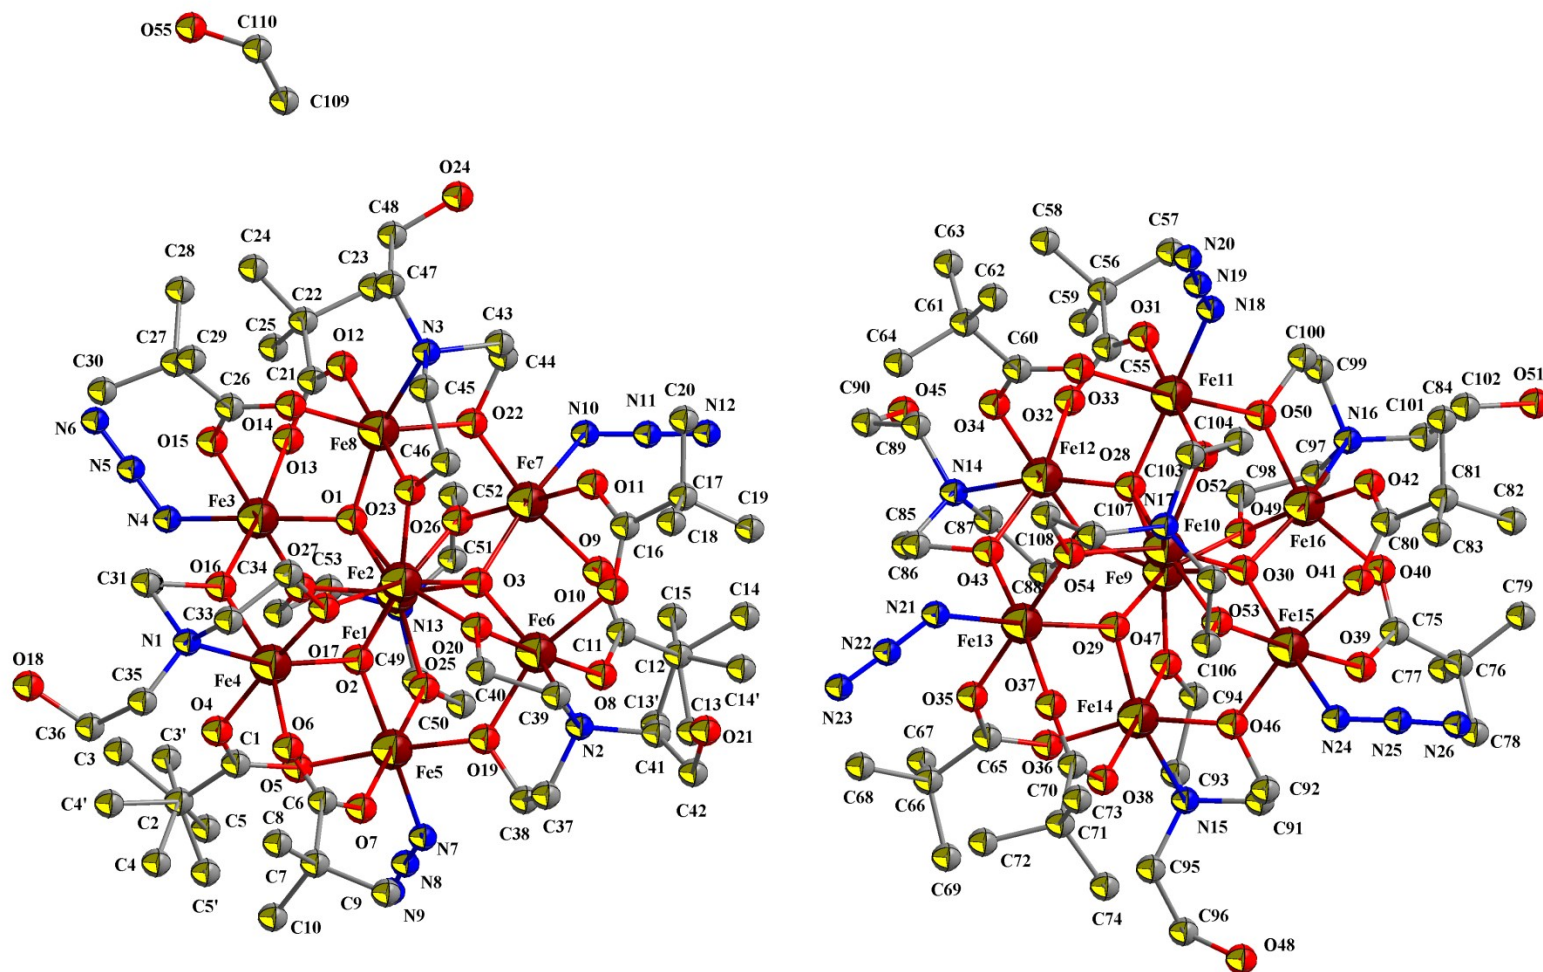

**Figure S4.** Asymmetric unit in the solid-state structure of  $[\text{Fe}_8\text{O}_2(\text{O}_2\text{CCMe}_3)_6(\text{N}_3)_3(\text{tea})(\text{Htea})_4] \cdot 0.5(\text{EtOH})$  (**3**) with atom numbering scheme. Hydrogen atoms are omitted for clarity.

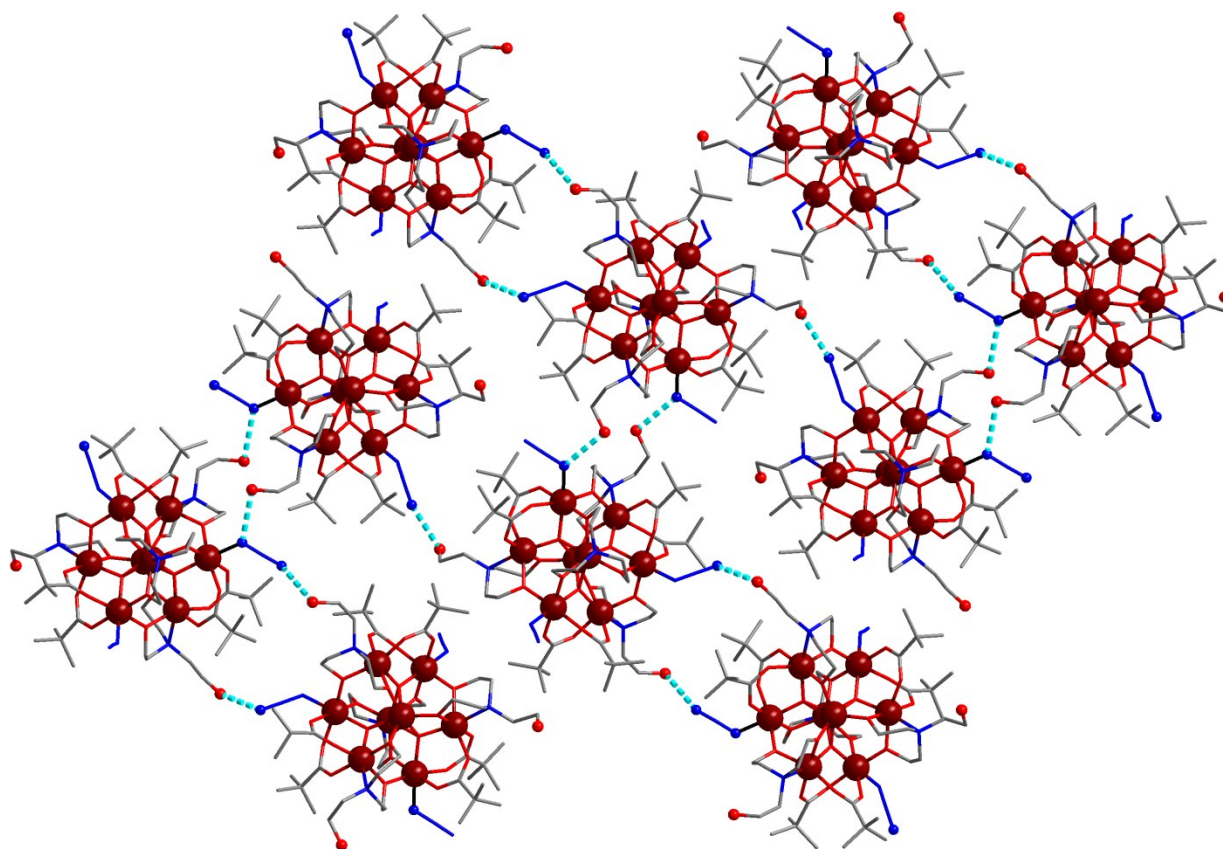

**Figure S5.** 2D layer formed in **3** through O–H···N interactions between protonated O atoms from  $\text{teaH}^{2-}$  and N atoms (azide). Intermolecular hydrogen bonds shown as dashed blue lines. All hydrogen atoms and solvent ethanol molecules are omitted for clarity. Color scheme: Fe, brown spheres; O, red; N, blue; C, grey sticks. Oxygen and nitrogen atoms that form hydrogen bonds are shown as red and blue balls, respectively.



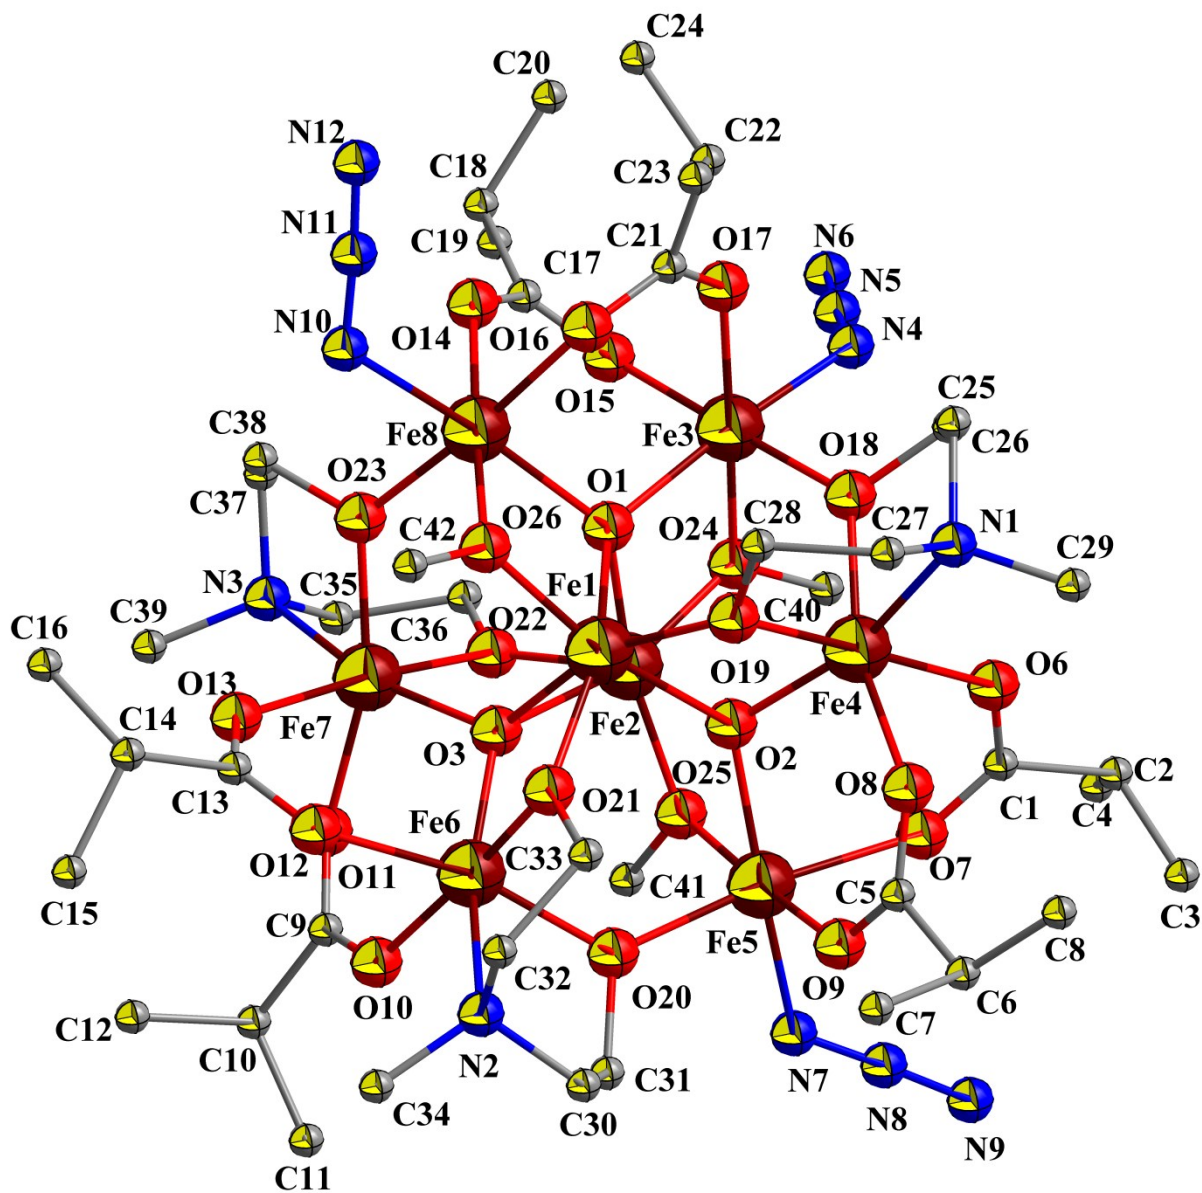

**Figure S6.** Asymmetric unit in the solid-state structure of  $[\text{Fe}_8\text{O}_3(\text{O}_2\text{CCHMe}_2)_6(\text{N}_3)_3(\text{mdea})_3(\text{MeO})_3]$  (**4**) with atom numbering scheme. Hydrogen atoms are omitted for clarity.

**Table S1.** BVS values<sup>a</sup>

| [Fe <sub>8</sub> O <sub>3</sub> (O <sub>2</sub> CCHMe <sub>2</sub> ) <sub>9</sub> (tea) (teaH) <sub>3</sub> ]·MeCN·2(H <sub>2</sub> O) (1)               |       |      |       | [Fe <sub>8</sub> O <sub>3</sub> (O <sub>2</sub> CCHMe <sub>2</sub> ) <sub>6</sub> (N <sub>3</sub> ) <sub>3</sub> (tea) (teaH) <sub>3</sub> ] (2)              |       |
|----------------------------------------------------------------------------------------------------------------------------------------------------------|-------|------|-------|---------------------------------------------------------------------------------------------------------------------------------------------------------------|-------|
| Fe1                                                                                                                                                      | 3.188 | Fe5  | 3.130 | Fe1                                                                                                                                                           | 2.816 |
| Fe2                                                                                                                                                      | 2.799 | Fe6  | 3.007 | Fe2                                                                                                                                                           | 3.142 |
| Fe3                                                                                                                                                      | 3.197 | Fe7  | 3.182 | Fe3                                                                                                                                                           | 2.985 |
| Fe4                                                                                                                                                      | 3.029 | Fe8  | 3.031 | Fe4                                                                                                                                                           | 3.031 |
| [Fe <sub>8</sub> O <sub>3</sub> (O <sub>2</sub> CCMe <sub>3</sub> ) <sub>6</sub> (N <sub>3</sub> ) <sub>3</sub> (tea)(teaH) <sub>3</sub> ]·0.5(EtOH) (3) |       |      |       | [Fe <sub>8</sub> O <sub>3</sub> (O <sub>2</sub> CCHMe <sub>2</sub> ) <sub>6</sub> (N <sub>3</sub> ) <sub>3</sub> (mdea) <sub>3</sub> (MeO) <sub>3</sub> ] (4) |       |
| Fe1                                                                                                                                                      | 2.711 | Fe9  | 3.146 | Fe1                                                                                                                                                           | 3.153 |
| Fe2                                                                                                                                                      | 3.169 | Fe10 | 2.770 | Fe2                                                                                                                                                           | 3.172 |
| Fe3                                                                                                                                                      | 3.112 | Fe11 | 3.088 | Fe3                                                                                                                                                           | 3.130 |
| Fe4                                                                                                                                                      | 3.025 | Fe12 | 3.035 | Fe4                                                                                                                                                           | 3.057 |
| Fe5                                                                                                                                                      | 3.130 | Fe13 | 3.114 | Fe5                                                                                                                                                           | 3.066 |
| Fe6                                                                                                                                                      | 2.982 | Fe14 | 3.026 | Fe6                                                                                                                                                           | 3.084 |
| Fe7                                                                                                                                                      | 3.088 | Fe15 | 3.138 | Fe7                                                                                                                                                           | 3.074 |
| Fe8                                                                                                                                                      | 3.007 | Fe16 | 2.955 | Fe8                                                                                                                                                           | 3.057 |

[a] N. E. Brese and M. O’Keeffe, *Acta Crystallogr.*, 1991, **B47**, 192; W. Liu and H.H. Thorn, *Inorg Chem.*, 1993, **32**, 4102.



### TGA/DTA data

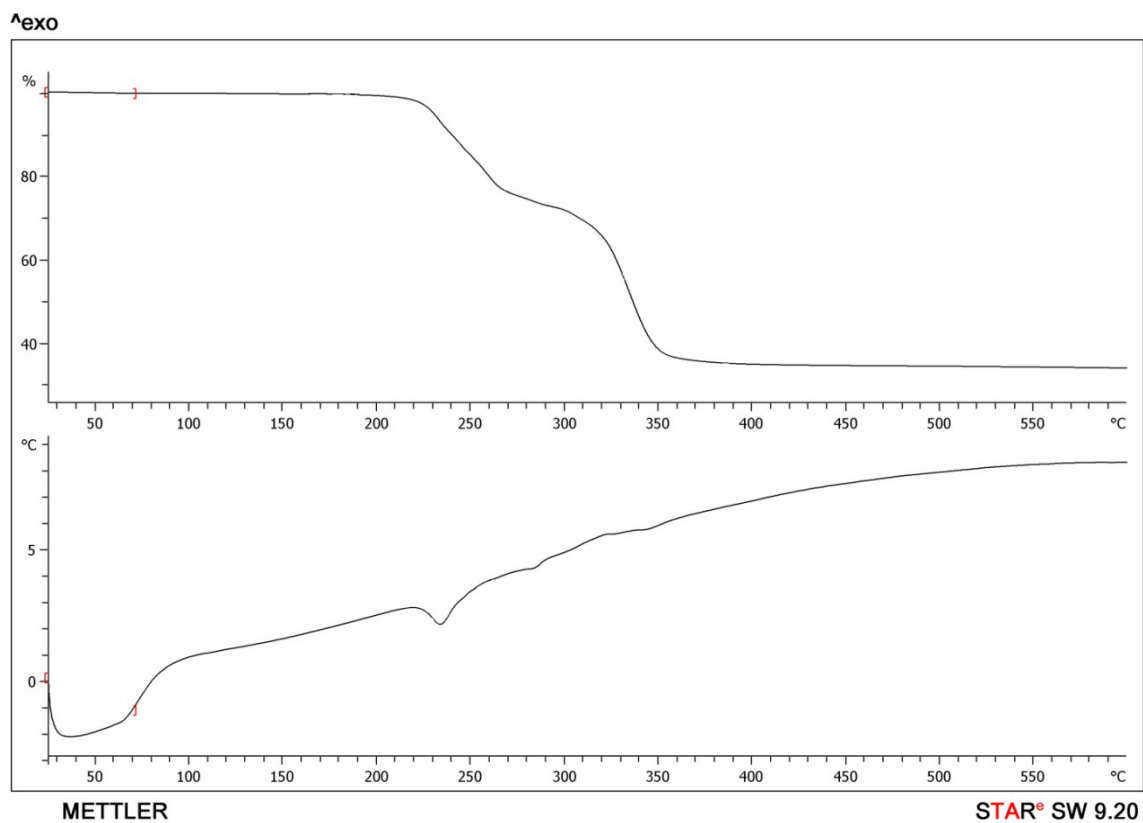

Figure S7. TGA/DTA curves of  $[\text{Fe}_8\text{O}_3(\text{O}_2\text{CCHMe}_2)_9(\text{tea})(\text{teaH})_3] \cdot \text{MeCN} \cdot 2(\text{H}_2\text{O})$  (1).

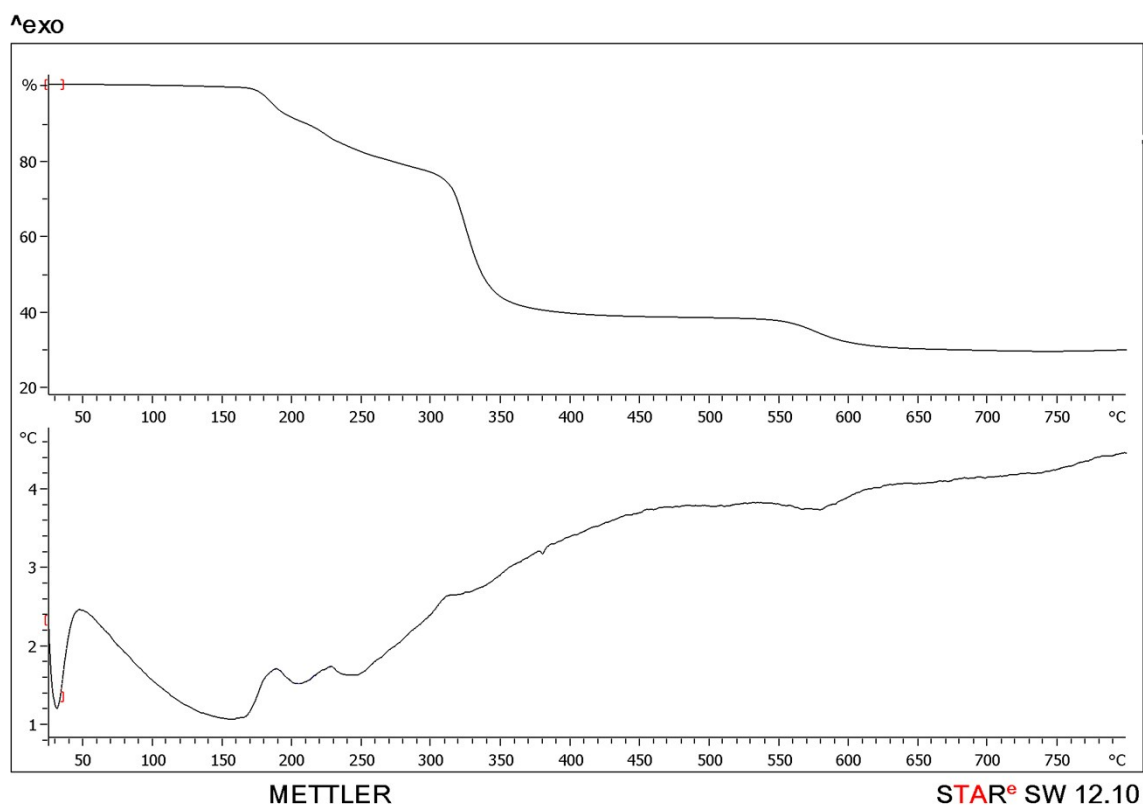

Figure S8. TGA/DTA curves of  $[\text{Fe}_8\text{O}_3(\text{O}_2\text{CCHMe}_2)_6(\text{N}_3)_3(\text{tea})(\text{teaH})_3]$  (2).

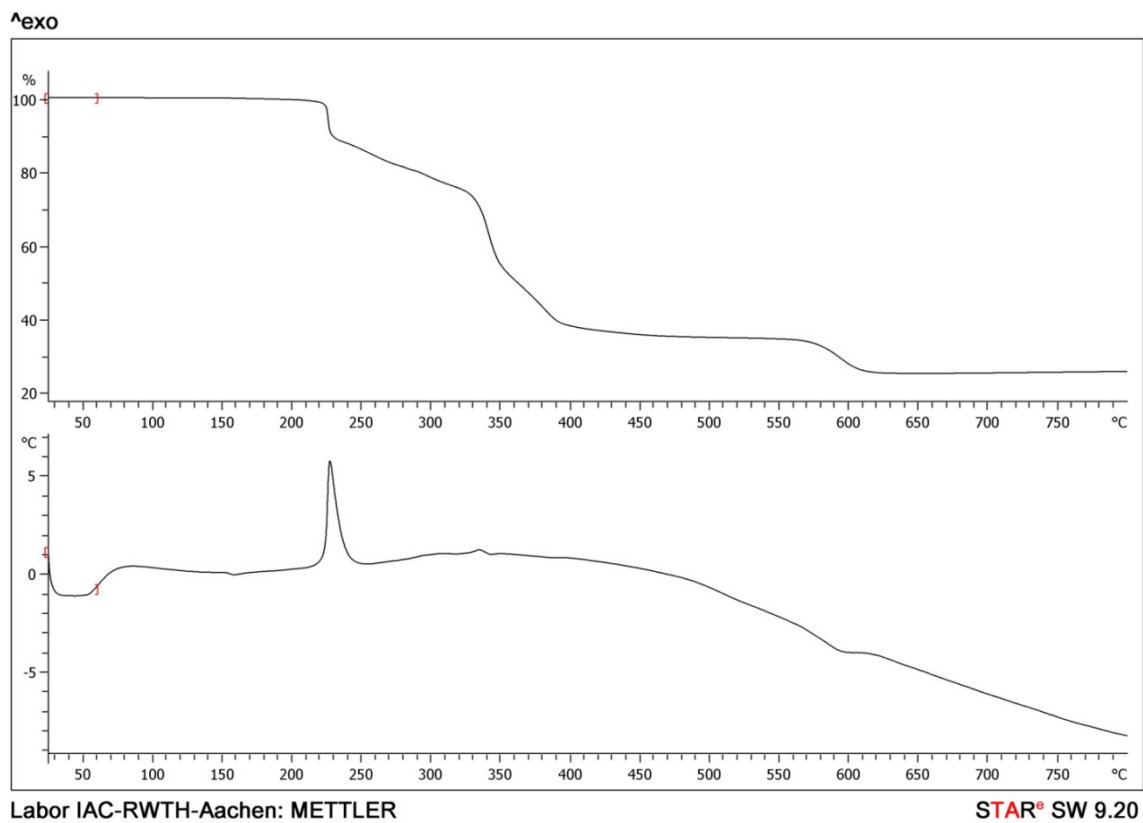

**Figure S9.** TGA/DTA curves for  $[\text{Fe}_8\text{O}_2(\text{O}_2\text{CCMe}_3)_6(\text{N}_3)_3(\text{tea})(\text{teaH})_4] \cdot 0.5(\text{EtOH})$  (**3**).

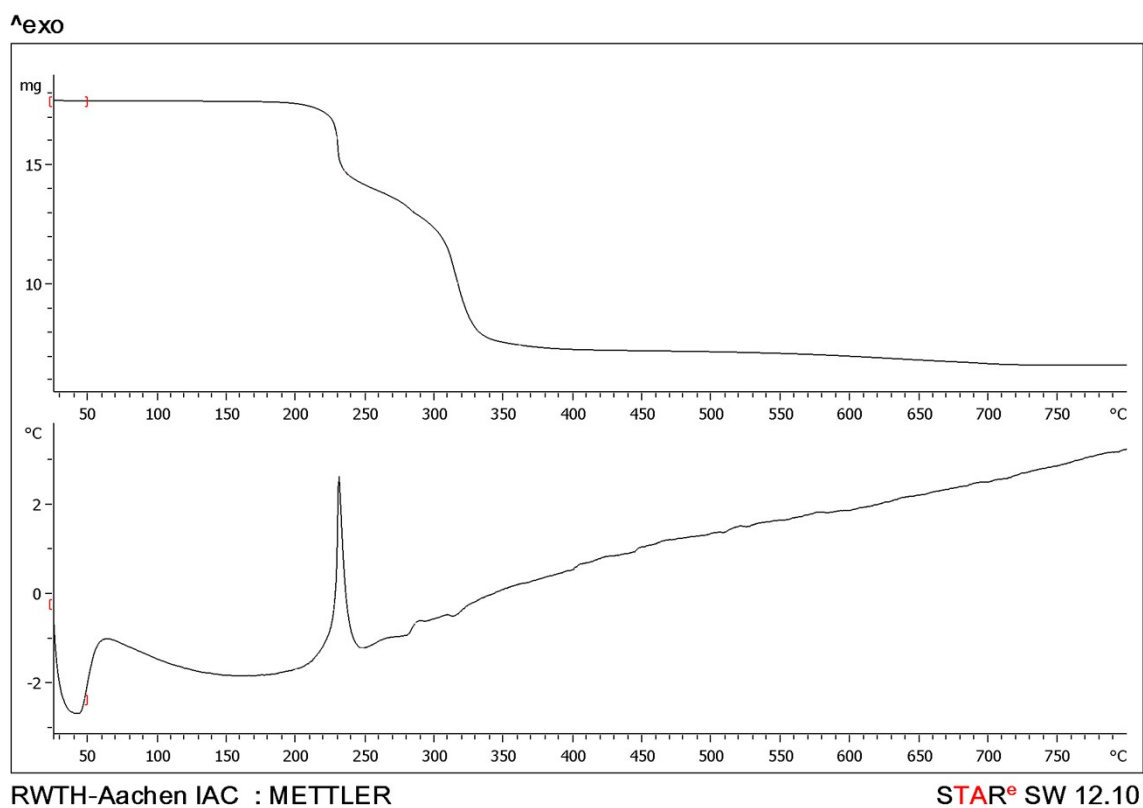

**Figure S10.** TGA/DTA curves for  $[\text{Fe}_8\text{O}_3(\text{O}_2\text{CCHMe}_2)_6(\text{N}_3)_3(\text{mdea})_3(\text{MeO})_3]$  (**4**).

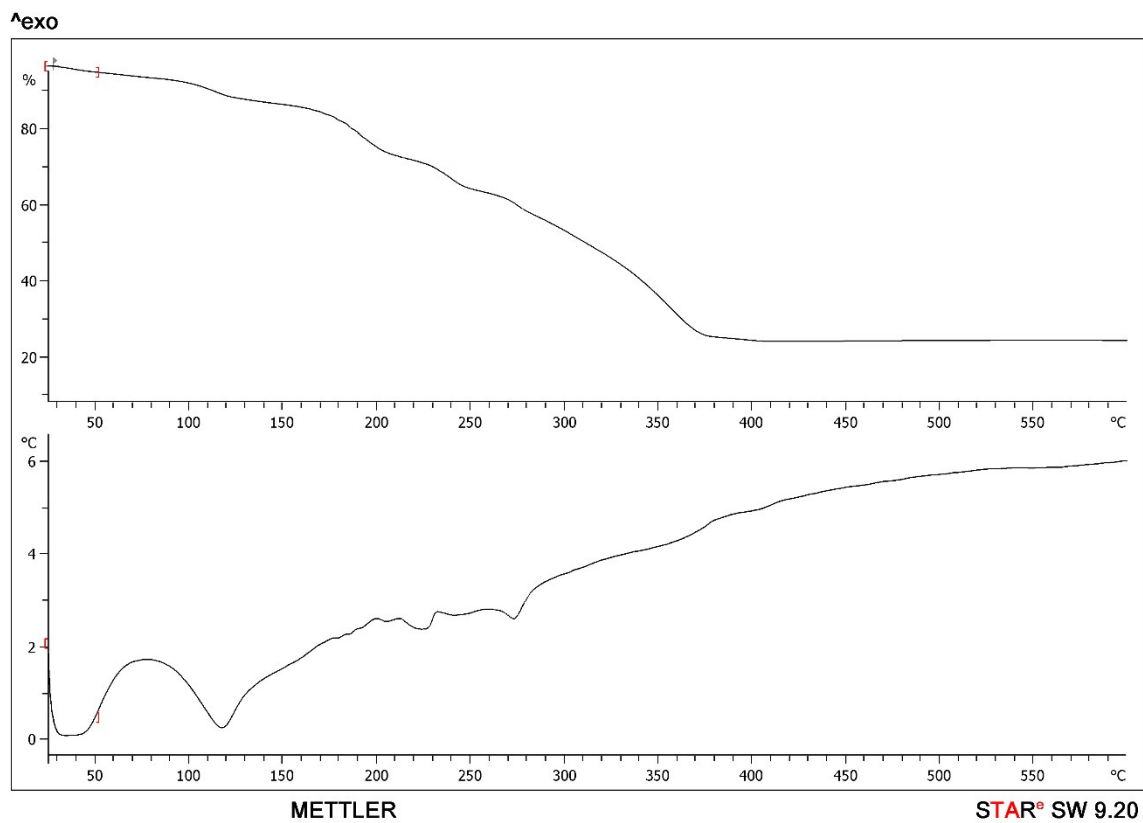

**Figure S11.** TGA/DTA curves of  $[\text{Fe}_3\text{O}(\text{O}_2\text{CCHMe}_2)_6(\text{H}_2\text{O})_3]\text{NO}_3 \cdot 2(\text{MeCN}) \cdot 2(\text{H}_2\text{O})$  (**5**).

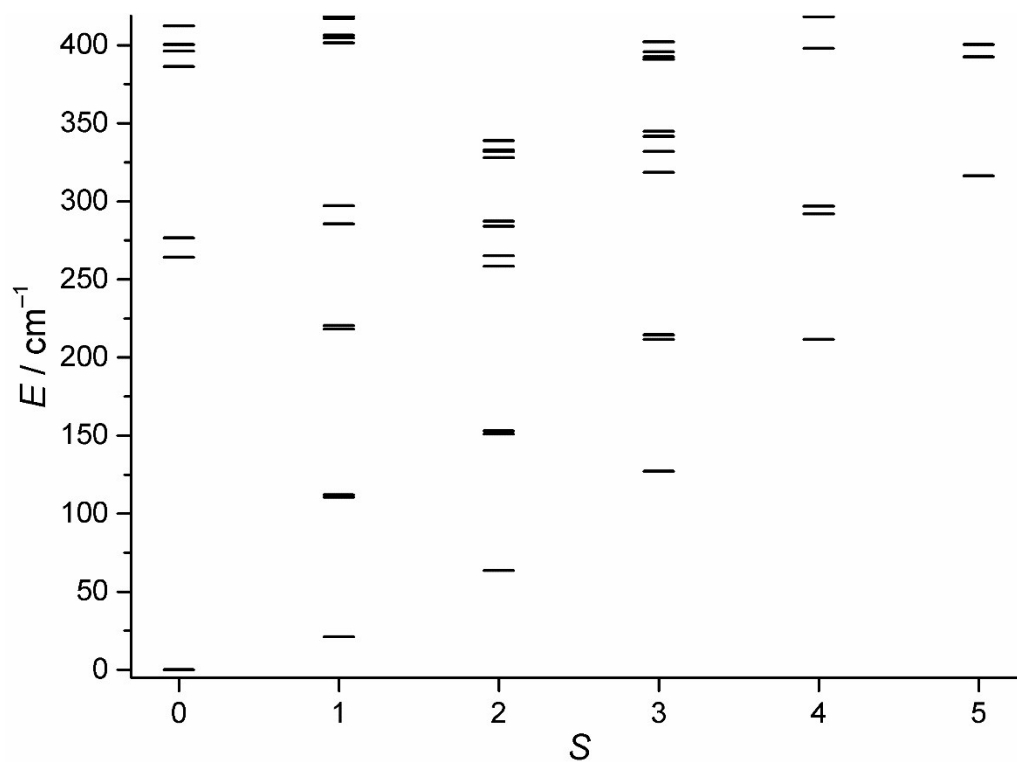

**Figure S12.** Calculated lowest energies  $E$  of total effective spin  $S$  states based on least-squares fit parameters for  $[\text{Fe}_8\text{O}_3(\text{O}_2\text{CCHMe}_2)_9(\text{tea})(\text{teaH})_3] \cdot \text{MeCN} \cdot 2(\text{H}_2\text{O})$  (**1**).

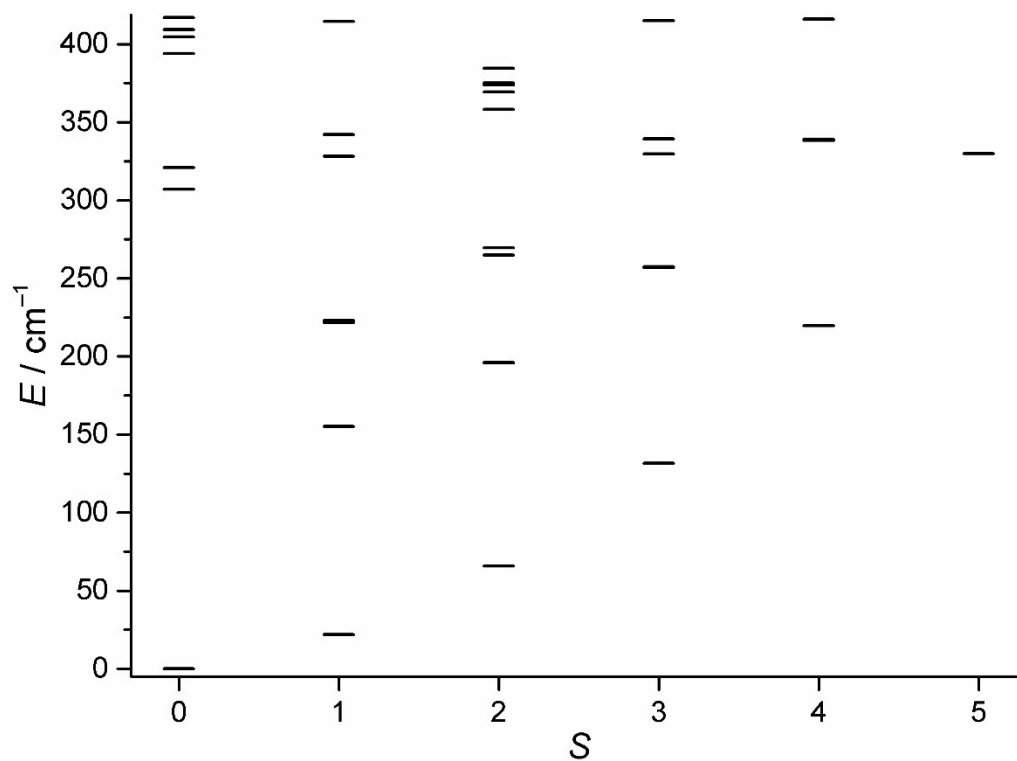

**Figure S13.** Calculated lowest energies  $E$  of total effective spin  $S$  states based on least-squares fit parameters for  $[\text{Fe}_8\text{O}_3(\text{O}_2\text{CCHMe}_2)_6(\text{N}_3)_3(\text{tea})(\text{teaH})_3]$  (**2**).

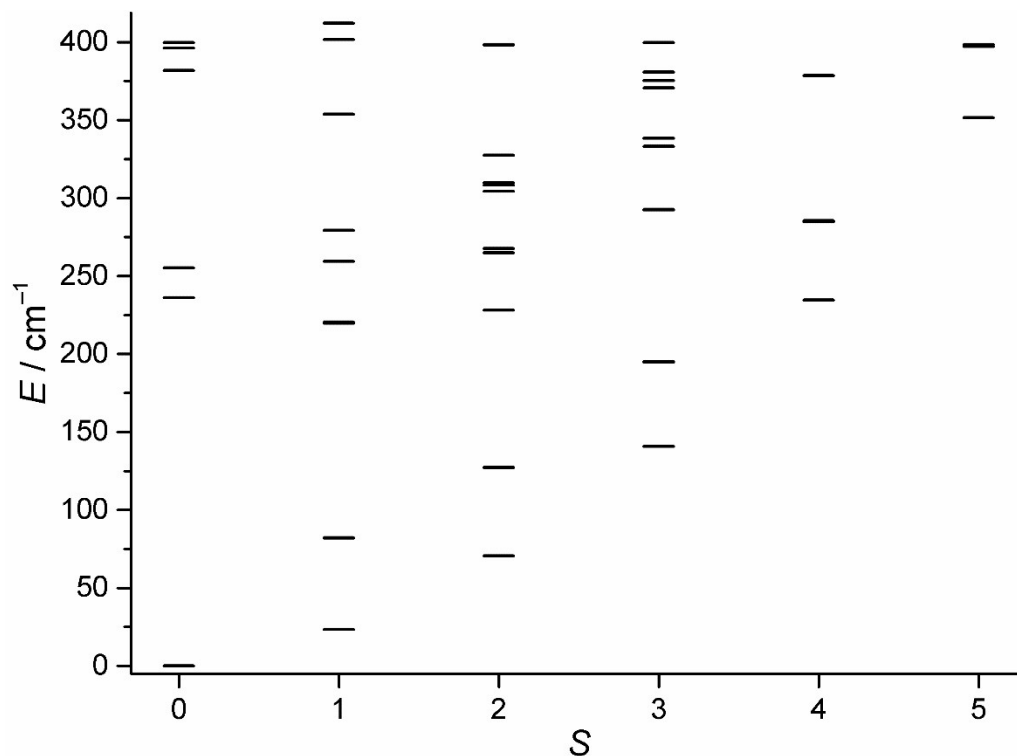

**Figure S14.** Calculated lowest energies  $E$  of total effective spin  $S$  states based on least-squares fit parameters for  $[\text{Fe}_8\text{O}_2(\text{O}_2\text{CCMe}_3)_6(\text{N}_3)_3(\text{tea})(\text{teaH})_4] \cdot 0.5(\text{EtOH})$  (3).

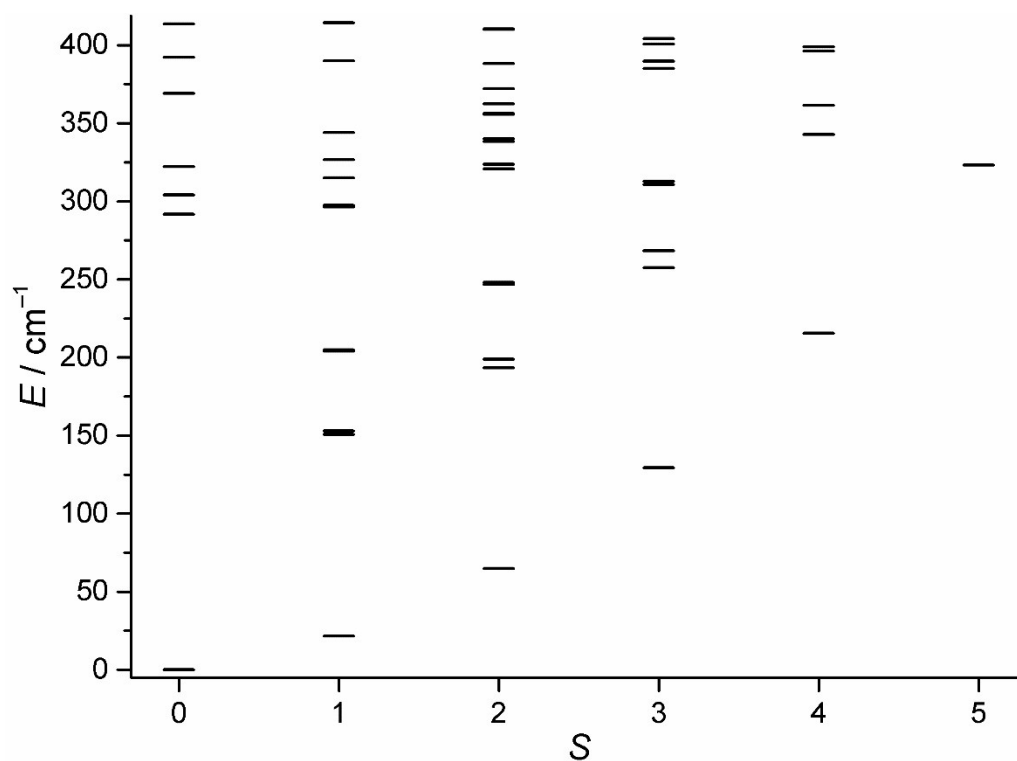

**Figure S15.** Calculated lowest energies  $E$  of total effective spin  $S$  states based on least-squares fit parameters for  $[\text{Fe}_8\text{O}_3(\text{O}_2\text{CCHMe}_2)_6(\text{N}_3)_3(\text{mdea})_3(\text{MeO})_3]$  (4).

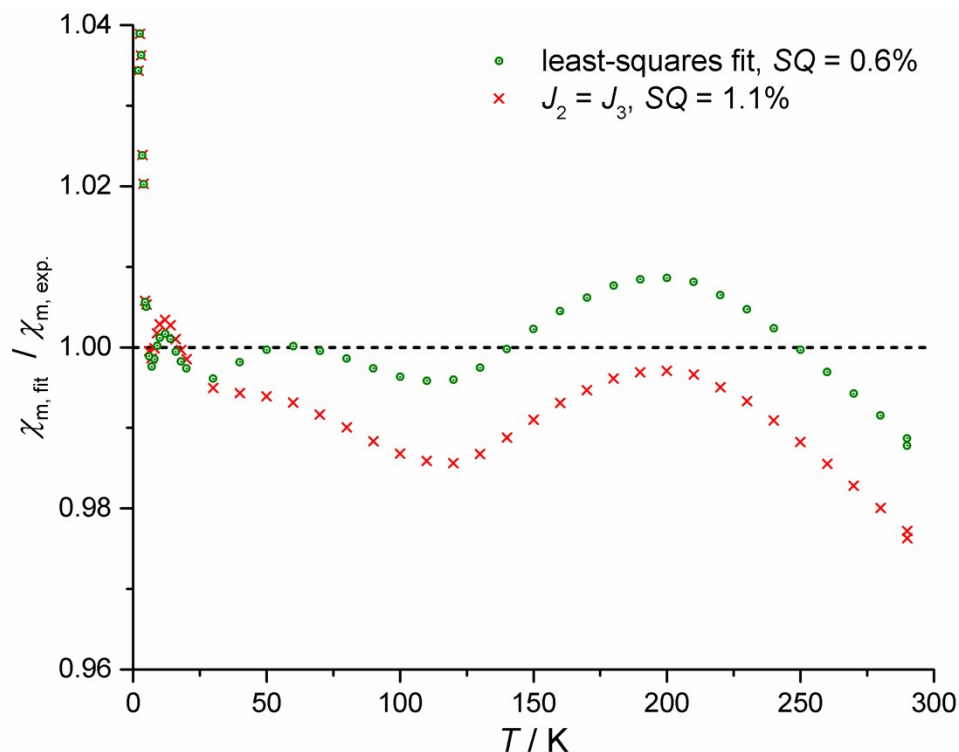

**Figure S16.** Comparison of the relative deviations of the 5- $J_i$  and 4- $J_i$  (setting  $J_3$  to the value of  $J_3$ ) model data from experimental  $\chi_m$  data for **1**. The dashed horizontal line at 1.00 represents the hypothetical situation of a perfect fit ( $\chi_{m,\text{fit}} \equiv \chi_{m,\text{exp.}}$ ).

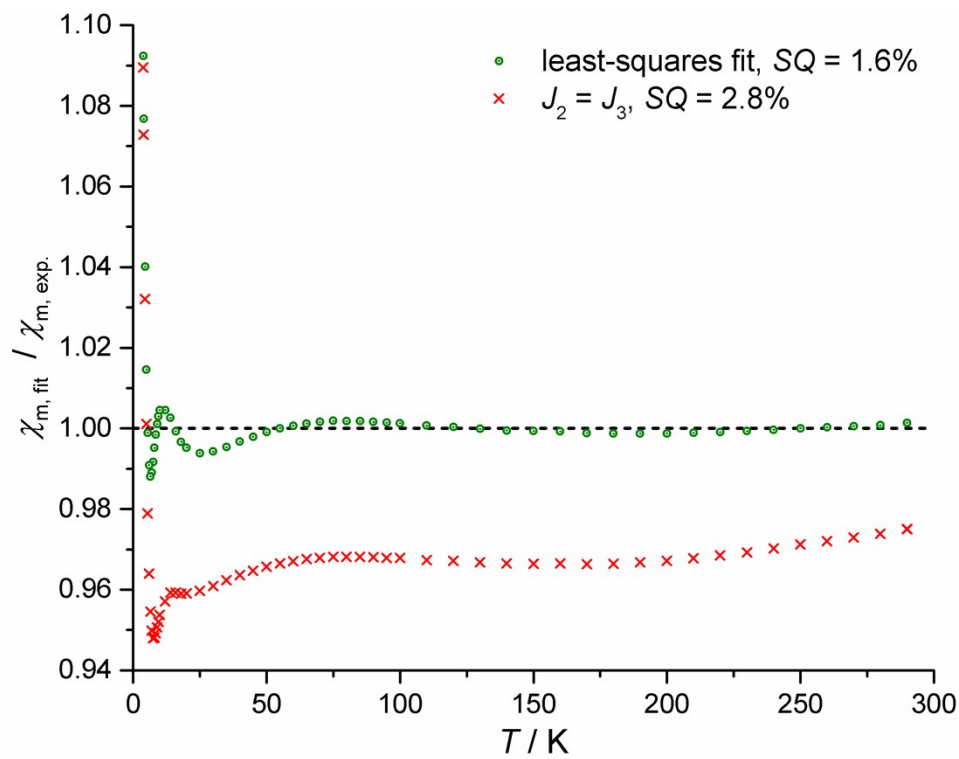

**Figure S17.** Comparison of the relative deviations of the 6- $J_i$  and 5- $J_i$  ( $J_2 = J_3$ ) model data from experimental  $\chi_m$  data for **4**. As in Fig. S16, a value of 1.00 would represent a perfect fit ( $\chi_{m,\text{fit}} \equiv \chi_{m,\text{exp.}}$ ).



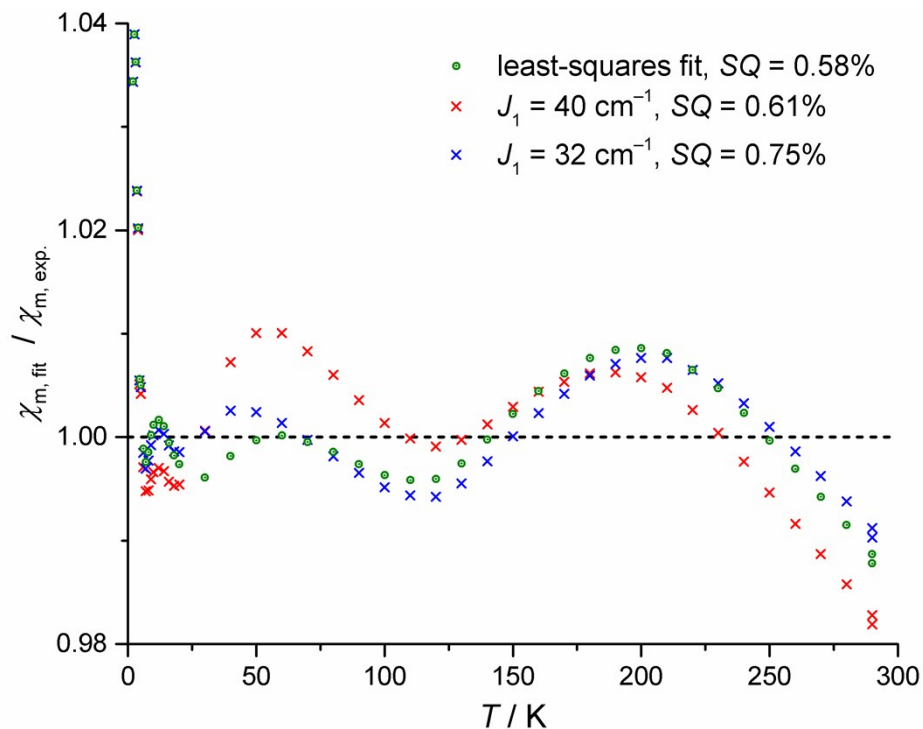

**Figure S18.** Influence of changes to  $J_1$ , the fitting parameter with the most correlation coefficients close to  $\pm 1$ . Shown are the relative deviations resulting from fixing  $J_1$  to values that have been arbitrarily modified ( $\pm 10\%$ ) compared to the least-squares fitting results. For the  $+10\%$  modification ( $J_1 = 40 \text{ cm}^{-1}$ ), the resulting least-squares fit yields  $J_2 = -23.0 \text{ cm}^{-1}$ ,  $J_3 = -22.7 \text{ cm}^{-1}$ ,  $J_4 = -14.9 \text{ cm}^{-1}$ ,  $J_5 = -9.1 \text{ cm}^{-1}$ . For the  $-10\%$  modification ( $J_1 = 32 \text{ cm}^{-1}$ ),  $J_2 = -26.6 \text{ cm}^{-1}$ ,  $J_3 = -19.3 \text{ cm}^{-1}$ ,  $J_4 = -11.6 \text{ cm}^{-1}$ ,  $J_5 = -11.3 \text{ cm}^{-1}$ .

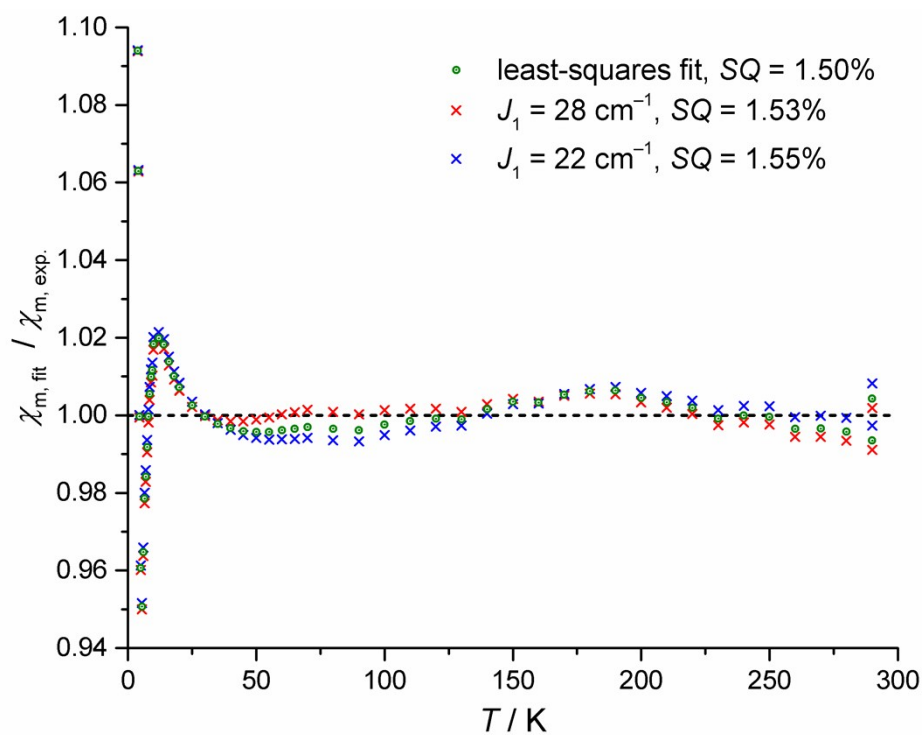

**Figure S19.** Same as Fig. S18, for compound **2**. Fixing  $J_1$  to 28 and 22  $\text{cm}^{-1}$ , the related fits yield  $J_2 = -22.9 \text{ cm}^{-1}$ ,  $J_3 = -21.9 \text{ cm}^{-1}$ ,  $J_4 = -12.5 \text{ cm}^{-1}$ ,  $J_5 = -10.6 \text{ cm}^{-1}$ , and  $J_2 = -22.2 \text{ cm}^{-1}$ ,  $J_3 = -20.6 \text{ cm}^{-1}$ ,  $J_4 = -18.4 \text{ cm}^{-1}$ ,  $J_5 = -3.7 \text{ cm}^{-1}$ , respectively.

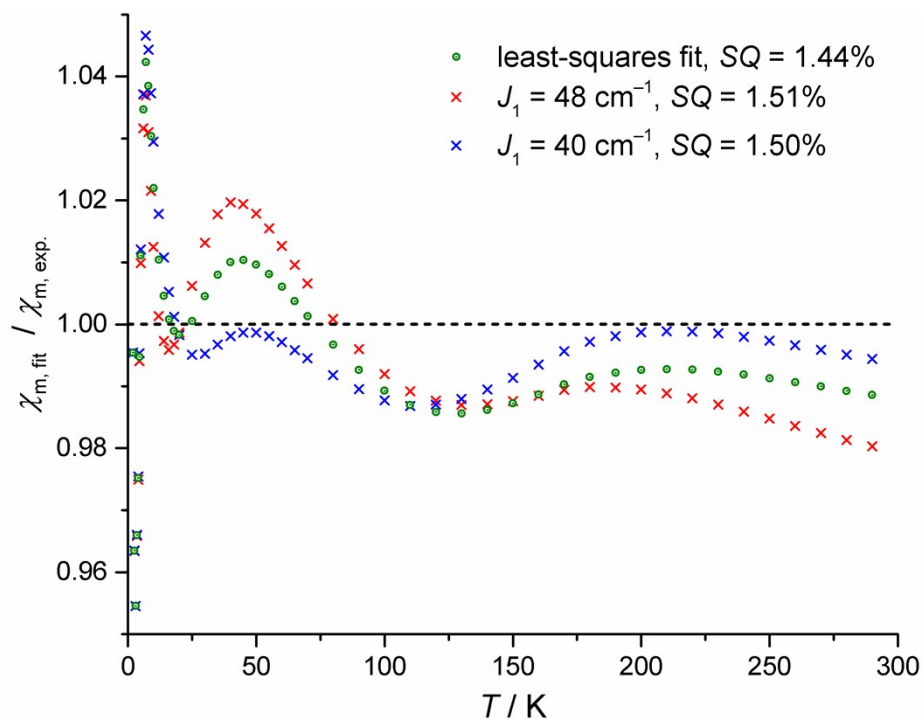

**Figure S20.** Same as Fig. S18, for compound **3**. Fixing  $J_1$  to 48 and 40  $\text{cm}^{-1}$ , the related fits yield  $J_2 = -22.7 \text{ cm}^{-1}$ ,  $J_3 = -22.7 \text{ cm}^{-1}$ ,  $J_4 = -19.9 \text{ cm}^{-1}$ ,  $J_5 = -7.0 \text{ cm}^{-1}$ , and  $J_2 = -22.1 \text{ cm}^{-1}$ ,  $J_3 = -22.1 \text{ cm}^{-1}$ ,  $J_4 = -20.0 \text{ cm}^{-1}$ ,  $J_5 = -5.8 \text{ cm}^{-1}$ , respectively.

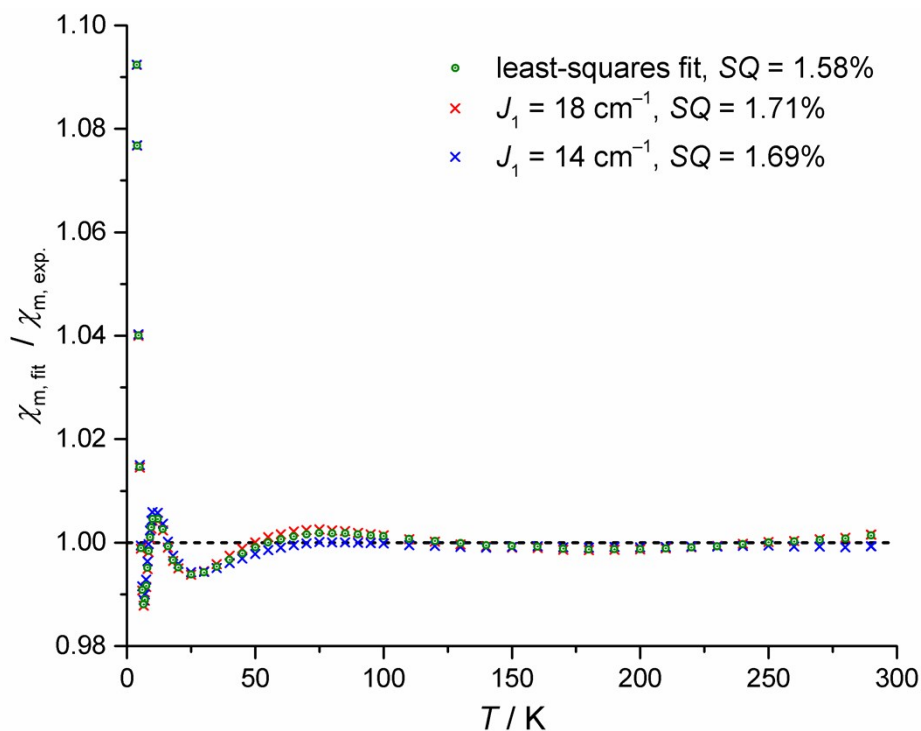

**Figure S21.** Same as Fig. S18, for compound **4**. Fixing  $J_1$  to 18 and 14  $\text{cm}^{-1}$ , the related fits yield  $J_2 = -17.5 \text{ cm}^{-1}$ ,  $J_3 = -17.2 \text{ cm}^{-1}$ ,  $J_4 = -10.3 \text{ cm}^{-1}$ ,  $J_5 = -36.2 \text{ cm}^{-1}$ ,  $J_6 = -14.0 \text{ cm}^{-1}$ , and  $J_2 = -17.3 \text{ cm}^{-1}$ ,  $J_3 = -17.0 \text{ cm}^{-1}$ ,  $J_4 = -9.6 \text{ cm}^{-1}$ ,  $J_5 = -46.2 \text{ cm}^{-1}$ ,  $J_6 = -12.0 \text{ cm}^{-1}$ , respectively.

### Correlation coefficients for magnetic exchange energies

The correlation coefficients<sup>[b]</sup> ( $\rho_{ik} = \text{cov}(J_i, J_k) / [\text{var}(J_i) \cdot \text{var}(J_k)]$ ) of the various least-squares fit parameters have been calculated (Tables S2–S5) to estimate their linear interdependencies. The interdependencies vary for each compound; however,  $J_1$  seems to generally feature the strongest correlation with the other parameters.

[b] Encyclopedia of Mathematics, Ed. M. Hazewinkel, Springer, London, 2010; Correlation coefficient. A.V. Prokhorov (originator), Encyclopedia of Mathematics, [http://www.encyclopediaofmath.org/index.php?title=Correlation\\_coefficient&oldid=12284](http://www.encyclopediaofmath.org/index.php?title=Correlation_coefficient&oldid=12284).

**Table S2.** Correlation coefficients of best fit for compound **1** ( $\rho_{ik} = \rho_{ki}$ ).

| $\rho$ | $J_1$ | $J_2$  | $J_3$  | $J_4$  | $J_5$  |
|--------|-------|--------|--------|--------|--------|
| $J_1$  | 1     | +0.811 | +0.953 | -0.726 | -0.129 |
| $J_2$  | —     | 1      | +0.926 | -0.706 | -0.634 |
| $J_3$  | —     | —      | 1      | +0.777 | -0.418 |
| $J_4$  | —     | —      | —      | 1      | +0.452 |
| $J_5$  | —     | —      | —      | —      | 1      |

**Table S3.** Correlation coefficients of best fit for **2** ( $\rho_{ik} = \rho_{ki}$ ).

| $\rho$ | $J_1$ | $J_2$  | $J_3$  | $J_4$  | $J_5$  |
|--------|-------|--------|--------|--------|--------|
| $J_1$  | 1     | +0.984 | +0.984 | +0.019 | -0.302 |
| $J_2$  | —     | 1      | +0.932 | +0.014 | -0.303 |
| $J_3$  | —     | —      | 1      | +0.014 | -0.303 |
| $J_4$  | —     | —      | —      | 1      | +0.947 |
| $J_5$  | —     | —      | —      | —      | 1      |

**Table S4.** Correlation coefficients of best fit for **3** ( $\rho_{ik} = \rho_{ki}$ ).

| $\rho$ | $J_1$ | $J_2$  | $J_3$  | $J_4$  | $J_5$  |
|--------|-------|--------|--------|--------|--------|
| $J_1$  | 1     | -0.715 | +0.715 | +0.623 | -0.627 |
| $J_2$  | —     | 1      | -0.984 | -0.455 | +0.555 |
| $J_3$  | —     | —      | 1      | +0.455 | -0.555 |
| $J_4$  | —     | —      | —      | 1      | -0.978 |
| $J_5$  | —     | —      | —      | —      | 1      |

**Table S5.** Correlation coefficients of best fit for **4** ( $\rho_{ik} = \rho_{ki}$ ).

| $\rho$ | $J_1$ | $J_2$  | $J_3$  | $J_4$  | $J_5$  | $J_6$  |
|--------|-------|--------|--------|--------|--------|--------|
| $J_1$  | 1     | +0.056 | +0.018 | +0.030 | +0.087 | +0.724 |
| $J_2$  | —     | 1      | +0.310 | +0.452 | -0.878 | +0.369 |
| $J_3$  | —     | —      | 1      | +0.140 | +0.530 | +0.115 |
| $J_4$  | —     | —      | —      | 1      | -0.511 | +0.167 |
| $J_5$  | —     | —      | —      | —      | 1      | +0.108 |
| $J_6$  | —     | —      | —      | —      | —      | 1      |
